# Supplementary material
Source: publisher figshare collection journal article supplement (https://gsapubs.figshare.com/ndownloader/files/23304236)
Supplement: Supplementary file 1 [file 23304236]

## 1    **Text DR1. Methods**

2            Discharge data recorded at Balat (1978 – 2013) (**Fig. DR1**) and Barik Menis (2000 – 2013)  
3    gauging stations (**Fig. 1** of manuscript) were provided by the Department of Irrigation and Drainage  
4    in Kota Kinabalu, Sabah, Malaysia. Bankfull discharges ( $Q_b$ ) were estimated fitting a type-two  
5    Gumbel distribution to annual maxima data from the Balat gauging station, the more complete of the  
6    two data sets. We assume  $Q_b$  corresponds to the 1.5 year recurrence event (Dury, 1976; Castro and  
7    Jackson, 2001). Without sufficient annual maxima data from the Barik Menis gauging station to  
8    repeat this process there, the bankfull estimate at Balat gauging station was adjusted based on the ratio  
9    of average daily flow between the two gauging stations, and the increase between the two assumed to  
10   be linearly proportional to streamwise distance. The estimate of  $Q_b$  at Balat was then adjusted for each  
11   study reach based on the streamwise distance between the study reach and Balat.

12           Average longitudinal water-surface slope ( $S$ ) for each meander was estimated using the  
13   Manning formula:

$$14 \quad U = \frac{R^{\frac{2}{3}}}{n} S^{\frac{1}{2}} \quad (S2)$$

15    where  $R$  is the hydraulic radius, and  $n$  is the manning's roughness coefficient, here taken as 0.035  
16    (Coon, 1997). These values are consistent with estimates of valley slope derived from SRTM digital  
17    elevation data for the region.

18           Reach averaged bankfull depths ( $h$ ) for reaches C and D were taken from measured channel  
19    cross-sections, where bankfull stage was assumed to be the level at which vegetation ceased to grow  
20    on the point bar. Cross-sections were measured using a sonic depth gauge (Norcross Hawkeye  
21    H22PX) when the river was at or very near bankfull flow conditions. Access to reaches A and B was

restricted, therefore a representative width to depth ratio was calculated from reaches C and D, and used to estimate bankfull depths for reaches A and B.

The scour factor ( $A$ ) was determined from cross section data for reaches C and D using the equation:

$$A = -\frac{m}{hnc} \quad (S1)$$

where  $n$  is the cross-stream coordinate,  $m$  is the local bed elevation,  $h$  is bankfull depth, and  $c$  is local curvature (Constantine et al., 2009). At the channel centre, both  $n$  and  $m$  are 0. To better represent the secondary flow induced by the imbalance between the lateral pressure gradient and centripetal force, we modify the scour factor according to Johannesson and Parker (1989).

Curvature was calculated at a spacing of 200 m along each centreline so as to capture the arc of the meander without being influenced by small-scale local variations. Curvature values were found by fitting a circle of radius  $r$  (units m) to three successive points along a river centreline ( $s_{i-1}$ ,  $s_i$ , and  $s_{i+1}$ ) such that all three points sit on the circle's circumference, with a curvature value of  $\frac{1}{r}$  being assigned to the middle point  $s_i$ . This was achieved by providing an initial estimate for the center point of the circle ( $\bar{s}$ ) and using a sequential least squares optimising algorithm (Kraft, 1988) to reduce the error in the difference between the distances from the estimated centre point to each of the three points ( $s_{i-1}$ ,  $s_i$ , and  $s_{i+1}$ ) to below 0.01 m. This optimised centre point yields three estimates of  $r$ , of which we used the mean to define curvature ( $c$ ) at point  $s_i$  (**Fig. DR2**). We report the maximum values of curvature for each river section.

Likewise, values of the velocity perturbation we report are taken as the maximum value within each river section, constituting a conservative estimate for the corresponding erodibility coefficient.

The automated process of identifying riverbank position from each Landsat derived NDVI mosaic resulted in a polygon outlining the river's extent in each of the four study reaches. These

polygons were then used to estimate reach averaged bankfull widths ( $2b$ ) by dividing the area of each by the length of the corresponding river centreline (**Table. DR1**).

Characteristic rooting depths for forested and cleared sections of the river were estimated by digging trial pits at 9 different locations, and from field observations of root structure within exposed cut banks. Along forested sections of the river the trial pits revealed a densely intertwined root network at the surface, comprised mainly of fine roots, but encompassing a wide range of diameters. Fine roots were largely confined to the top 0.5 m, below which the average diameter increased with depth, while the root density rapidly declined. At the maximum trial pit depths of 1.0–1.5 m, nearly all roots were absent, with the exception of a few with the largest diameters ( $> 15$  mm). Observations of exposed cut banks along forested sections suggest that these larger roots tend not to extend below ~2 m.

Cleared sections of riverbank were almost exclusively colonized by grass species (*Phragmites australis* and *Pennisetum purpureum*), whose root structure was located below clumped stands of stems distributed 0.5–1 m apart. This meant that root density was very heterogeneous, with regions between stands where roots were sparse. Below the stem stands, roots formed a top-heavy conical structure with a large tap root extending downwards to ~0.5 m and with many fine roots extending latterly at the surface, reducing in density with depth. At the bottom of trial pits (~1.0 m) only trace amounts of fine roots were found.

To distinguish between forested river sections, and those cleared of forest, we developed a land classification scheme using the software eCognition, which uses a set of training data to identify spectral signatures and shape parameters (Baatz et al., 2000) from the 2009 Landsat 5 set of bandwidths that correspond to forested land, agricultural land, and bare earth. The set of training data were constrained to areas that were clearly visible in a high-resolution image (Google Earth™), and to areas that we had observed in the field. To verify this classification scheme, we applied it to the remainder of the 2009 Landsat image and confirmed its application using Google Earth™. We then applied this classification to each Landsat image prior to 2009 to identify sections along the river that

72 underwent forest clearing. Forested river sections in the 2014 Landsat 8 image were identified using  
73 several high resolution images from Google Earth™.

74 Field observations of the Kinabatangan River along reaches C and D (Fig. 1 of manuscript)  
75 show it to be sand-bedded, although we were unable to obtain samples of bed material to determine  
76 characteristic grain size.

77

#### 78 **Text DR2. Uncertainty**

79 To assess the error inherent in our measurements of meander migration, we identified 17 river  
80 sections located through reaches B and C where high resolution (60cm pixel size) DigitalGlobe™  
81 imagery was available for the years 2009 and 2014 via Google Earth™. By delineating bank lines  
82 from these high resolution images, and measuring the migration of the river centerline, we compared  
83 these results with those obtained from Landsat imagery for the same time span. The mean absolute  
84 difference in the centreline migrations derived from these two sources is 1.46 m ( $\sigma = 1.12$ ), which,  
85 when averaged over the timespan of 5 years, provides an estimate for error in our measurement of  
86 meander migration rates of 0.29 m/yr. While we acknowledge that there is still error in the use of high  
87 resolution imagery to measure meander migration, the error associated with measurements taken from  
88 images with 60 cm resolution will be insignificant compared to those taken from images with 30 m  
89 resolution. (Due to the lack of available images spanning our study reaches, we were unable to extend  
90 the range of high resolution meander migration measurements.)

91

92    **REFERENCES CITED**

- 93    Baatz, M., Schäpe, A., Strobl, J., Blaschke, T., and Griesebner, G., 2000, Multiresolution  
94        Segmentation-an optimization approach for high quality multi-scale image segmentation:  
95        Angewandte Geographische Informationsverarbeitung, v. 12, p. 12–23.
- 96    Coon, W. F., 1997, Estimation of roughness coefficients for natural stream channels with vegetated  
97        banks: USGS Water-Supply Paper, v. 2441, p. 1–133.
- 98    Kraft, D. A., 1988, software package for sequential quadratic programming: DFVLR  
99        Obersfaffeuhofen, Germany.

100     Table DR1:     Reach measurements of river area, centreline length and corresponding average widths for each Landsat image.

| Year          | Reach A |        |       | Reach B |        |        | Reach C + D |        |        | Total    |        |        |
|---------------|---------|--------|-------|---------|--------|--------|-------------|--------|--------|----------|--------|--------|
|               | Area    | Length | Width | Area    | Length | Width  | Area        | Length | Width  | Area     | Length | Width  |
| 1989          | 4784320 | 54400  | 87.95 | 4889936 | 43300  | 112.93 | 6680857     | 49600  | 134.69 | 16355113 | 147300 | 111.03 |
| 1996          | 4774540 | 54400  | 87.78 | 4969936 | 43400  | 114.49 | 6666429     | 49800  | 133.86 | 16410905 | 147600 | 111.19 |
| 2001          | 5003576 | 54400  | 91.98 | 4919638 | 43400  | 113.38 | 7013878     | 49900  | 140.56 | 16937093 | 147700 | 114.68 |
| 2005          | 4834398 | 54500  | 88.70 | 4854038 | 43500  | 111.59 | 7027178     | 50100  | 140.27 | 16715614 | 148100 | 112.87 |
| 2009          | 5042701 | 54500  | 92.53 | 5037636 | 43500  | 115.82 | 6772678     | 50300  | 134.64 | 16853015 | 148300 | 113.64 |
| 2014          | 4759049 | 54500  | 87.32 | 5020536 | 43600  | 115.14 | 6990878     | 50500  | 138.43 | 16770463 | 148600 | 112.85 |
| Average Width |         |        | 89.38 |         |        |        |             |        |        |          |        |        |

102 Table DR2. Values used in calculation of  $\omega$

| River Section:                         | Reach A<br>(1 – 20) | Reach B<br>(21 – 40)                 | Reach C<br>(41 – 56) | Reach D<br>(57 – 67) |
|----------------------------------------|---------------------|--------------------------------------|----------------------|----------------------|
| Bankfull discharge $Q_b$ [ $m^3 / s$ ] | 947.86              | 1242.27<br>(1428.61 after tributary) | 1708.42              | 2198.64              |
| Average bankfull width $2b$<br>[m]     | 89.38               | 113.89                               | 130.16               | 146.23               |
| Average bankfull depth $h$ [m]         | 5.2                 | 6.7                                  | 7.83                 | 8.33                 |
| Average Slope $S$                      | 0.0004              | 0.0003                               | 0.0003               | 0.0003               |
| Manning's roughness<br>coefficient $n$ | 0.035               | 0.035                                | 0.035                | 0.035                |
| Scour Factor $A$                       | 3                   | 3                                    | 3                    | 3                    |

103

104

105 Table DR3. List of reach characteristics

|                                                                 | Reach A<br>(Section 1 – 20) | Reach B<br>(Section 21 – 40) | Reach C<br>(Section 41 – 56) | Reach D<br>(Section 57 – 67) |
|-----------------------------------------------------------------|-----------------------------|------------------------------|------------------------------|------------------------------|
| Streamwise length [m]                                           | 54500                       | 43603                        | 29415                        | 21088                        |
| Sinuosity                                                       | 2.73                        | 2.41                         | 1.46                         | 2.64                         |
| Upstream Coordinates<br>[ <sup>0</sup> lat, <sup>0</sup> lon]   | 5.2217,<br>117.4982         | 5.3595, 117.6655             | 5.4123, 117.9394             | 5.4106, 118.0789             |
| Downstream Coordinates<br>[ <sup>0</sup> lat, <sup>0</sup> lon] | 5.3595,<br>117.6655         | 5.4729, 117.7989             | 5.4106, 118.0789             | 5.4600, 118.1573             |
| No. cleared river sections                                      | 7                           | 6                            | 4                            | 5                            |

106

107



108     Table DR4. Landsat image identification

| Year | Path | Row | ID                    |
|------|------|-----|-----------------------|
| 1989 | 117  | 056 | LT51170561989264BKT00 |
| 1996 | 117  | 056 | LT51170561996220CLT00 |
| 2001 | 117  | 056 | LE71170562001177EDC00 |
| 2005 | 117  | 056 | LT51170562005260BKT00 |
| 2009 | 117  | 056 | LT51170562009223BKT00 |
| 2014 | 117  | 056 | LC81170562014365LGN00 |

109

110

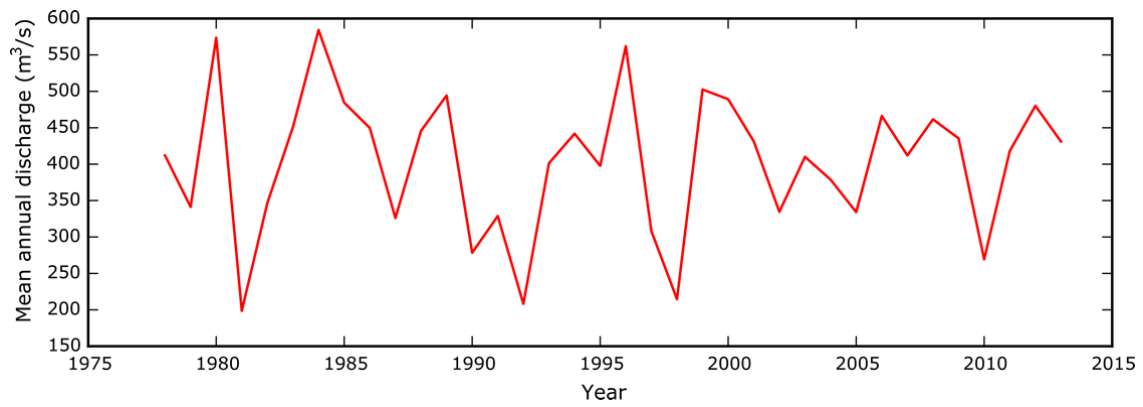

**Figure DR1:** Mean annual discharge data collected from Balat gauging station (1978 – 2013).

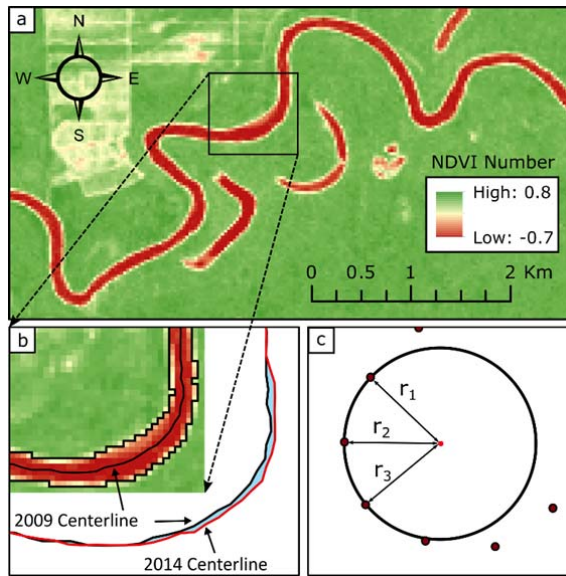

**Figure DR2.** Meander migration and curvature calculation methodologies. **a**, NDVI mosaic derived from TM/Landsat-5 image (11/10/2009). **b**, Automatically derived river bank lines and associated river centreline for 2009 image, 2009 and 2014 centrelines superposed to form a polygon representing the area eroded. **c**, Fitting of circle to estimate curvature ( $\frac{1}{r}$ ) at point  $r_2$ .

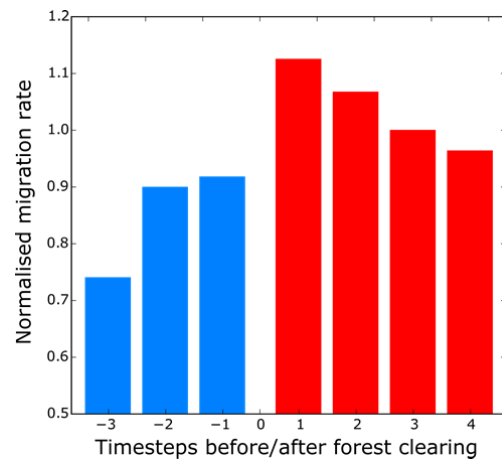

124

125 **Figure DR3:** Mean migration rates for sections of river that have been cleared of forest,  
 126 sorted by the number of time steps (successive pair of Landsat images i.e., 1989-1996, 1996-  
 127 2001, 2001-2005, 2005-2009, 2009-2014) before and after forest clearing. Migration rates for  
 128 individual river sections have been normalised by the mean migration rate across all time  
 129 steps for that river section.

130
